# Supplementary material for: Investigation of umami peptides and taste mechanisms in Agrocybe aegerita: based on sensory evaluation and molecular docking techniques
Source: Royal Society of Chemistry journal article supplement (doi:10.1039/d4fo01369g), 2024-01-01
Supplement: d4fo01369g1.pdf [file d4fo01369g1.pdf]

A

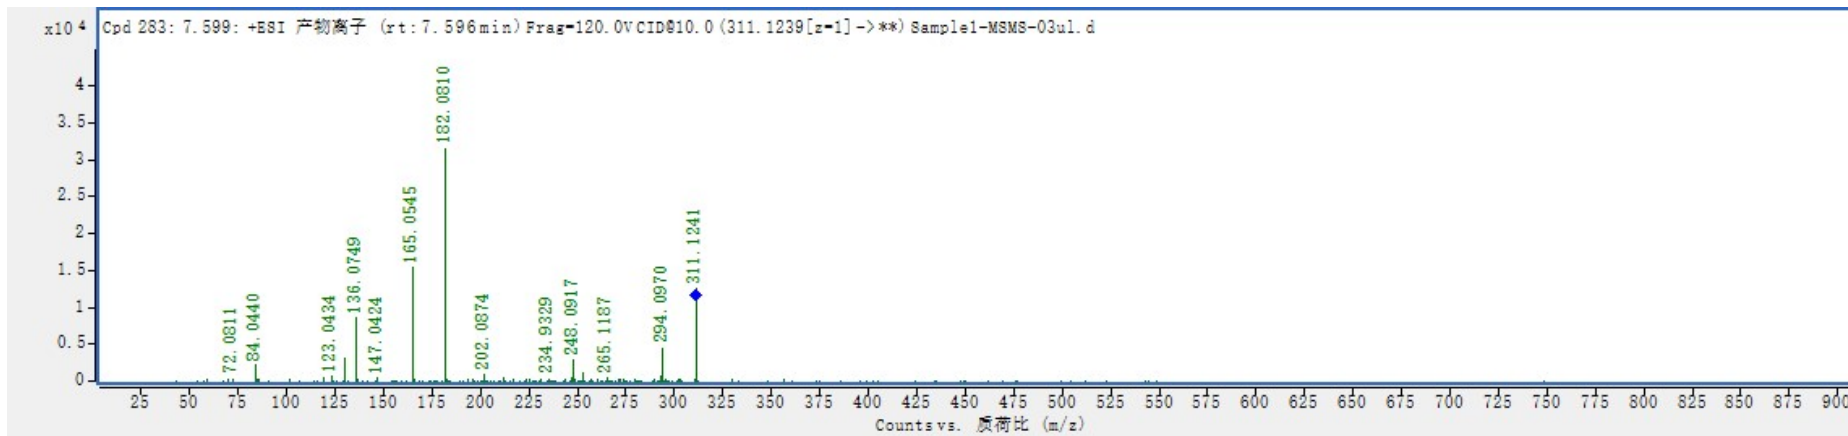

B

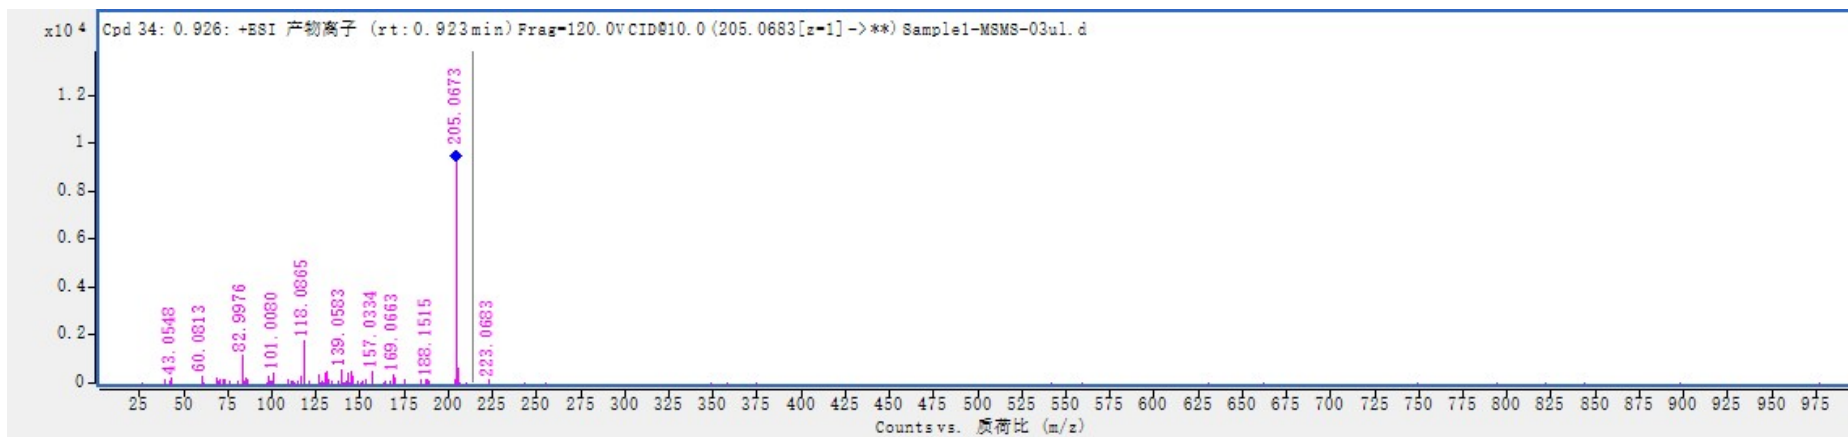

C

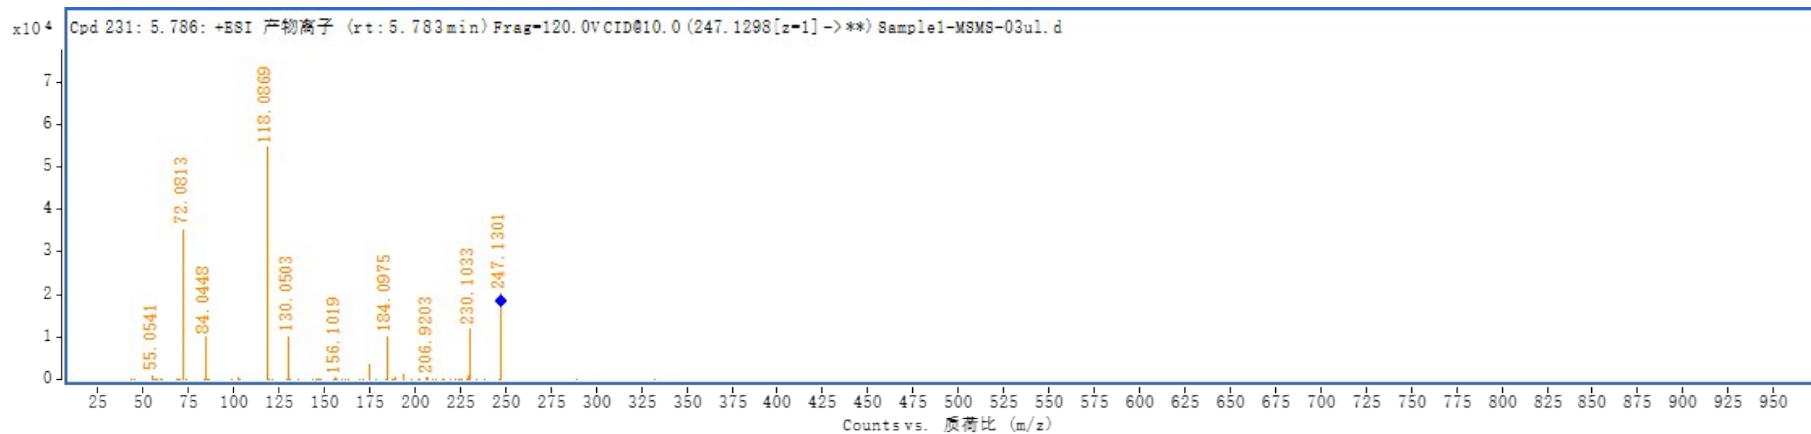

D

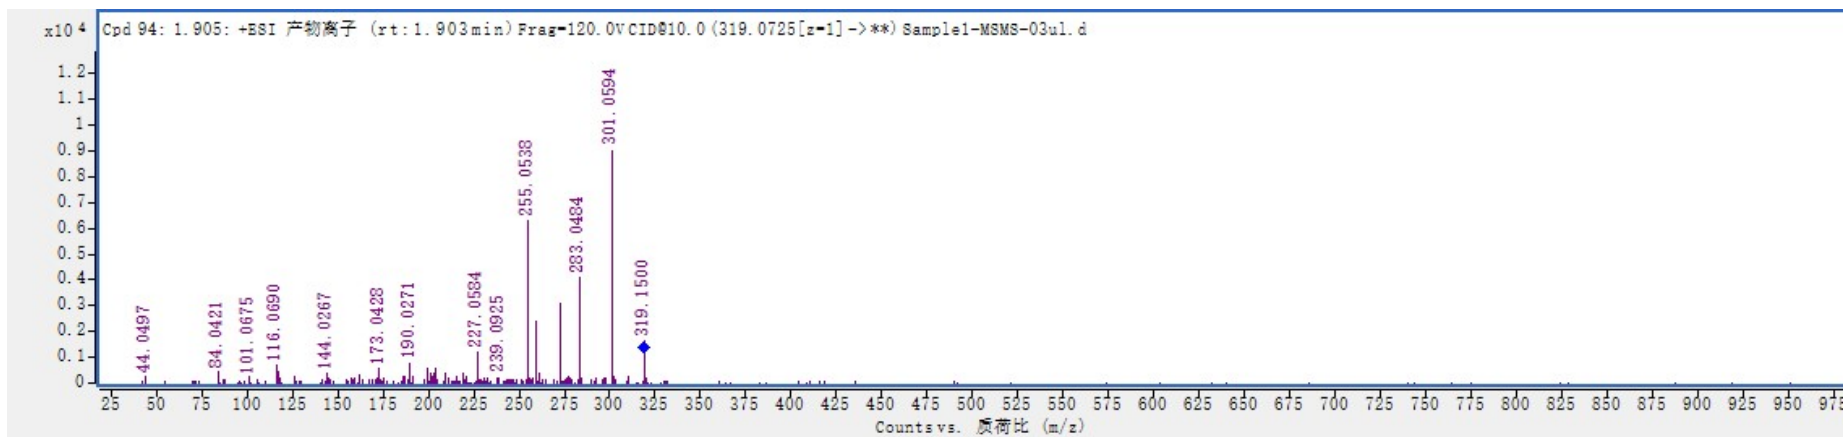

E

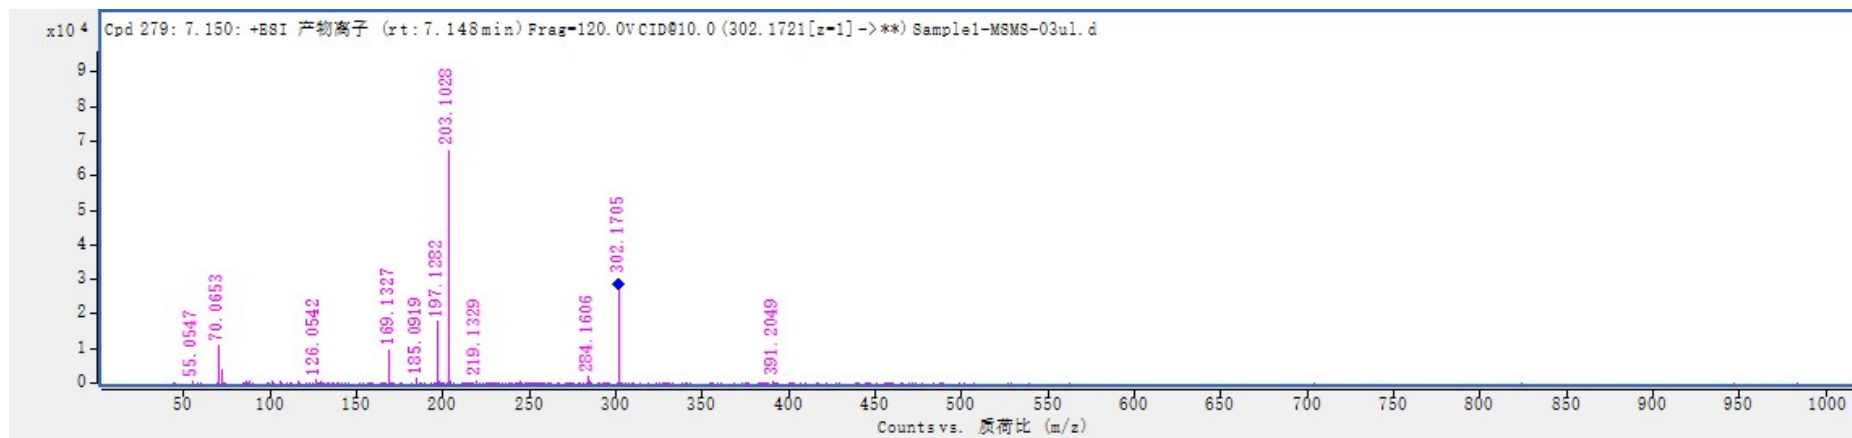

F

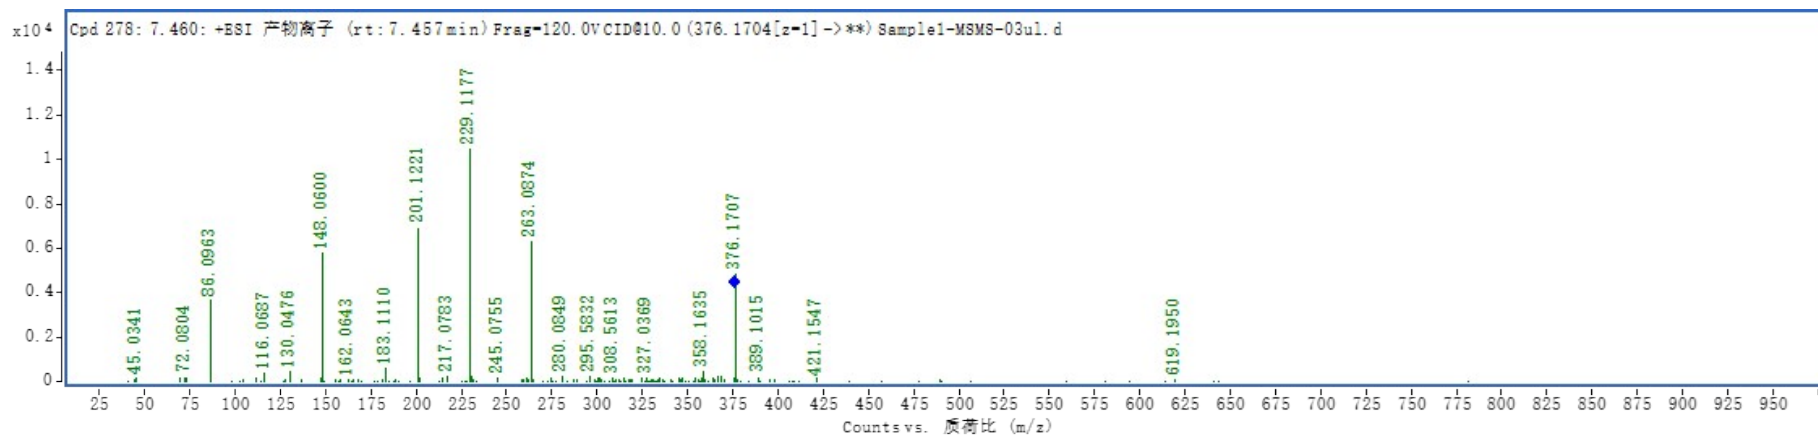

G

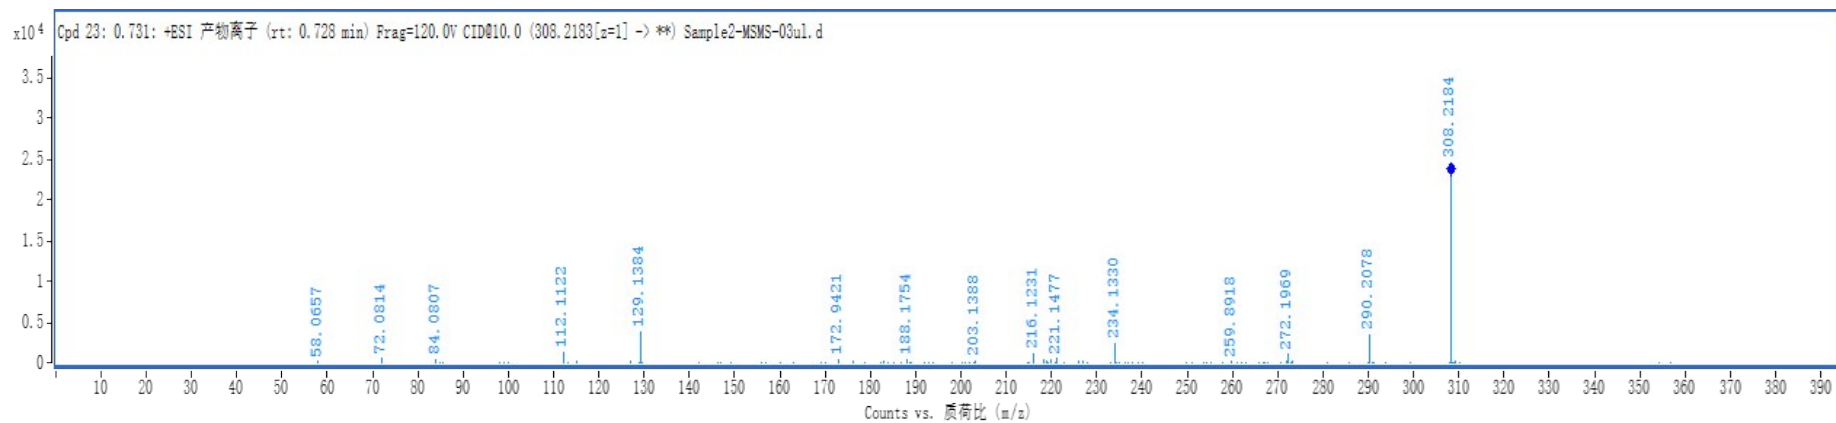

H

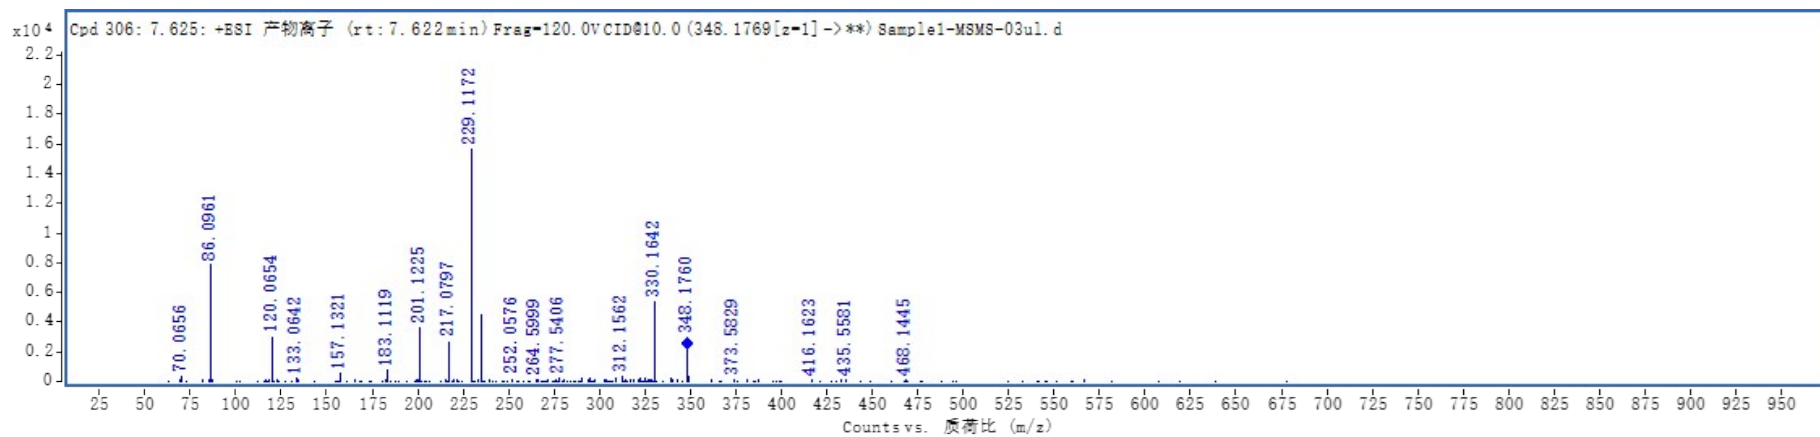

I

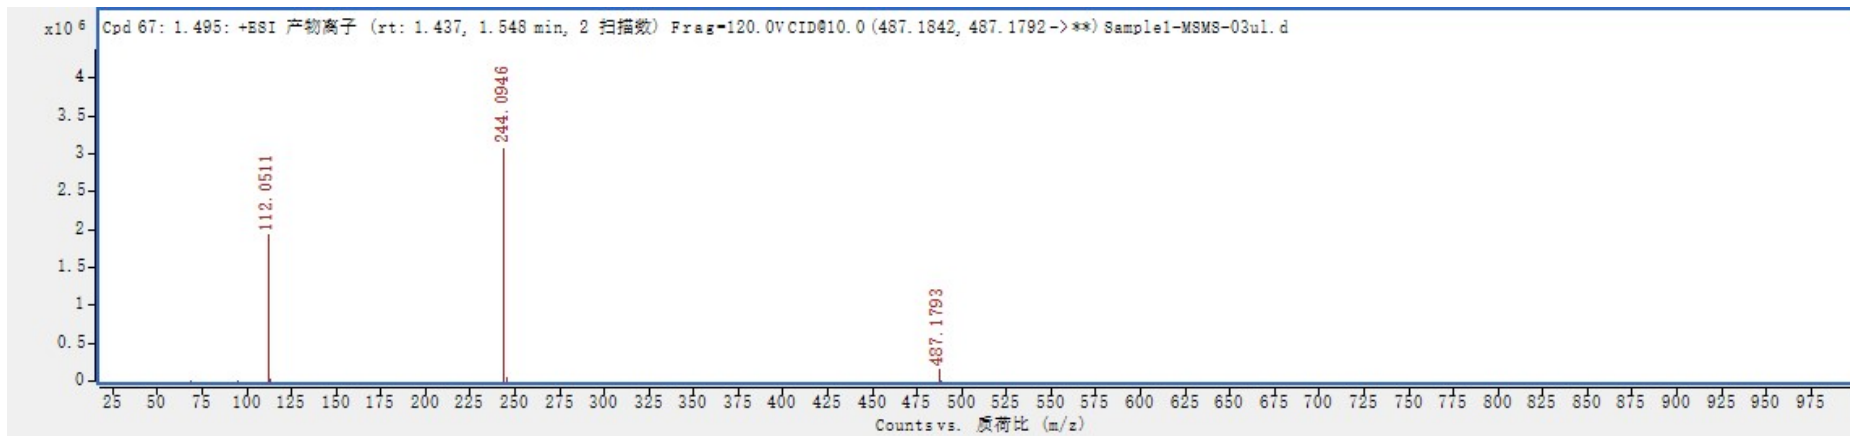

J

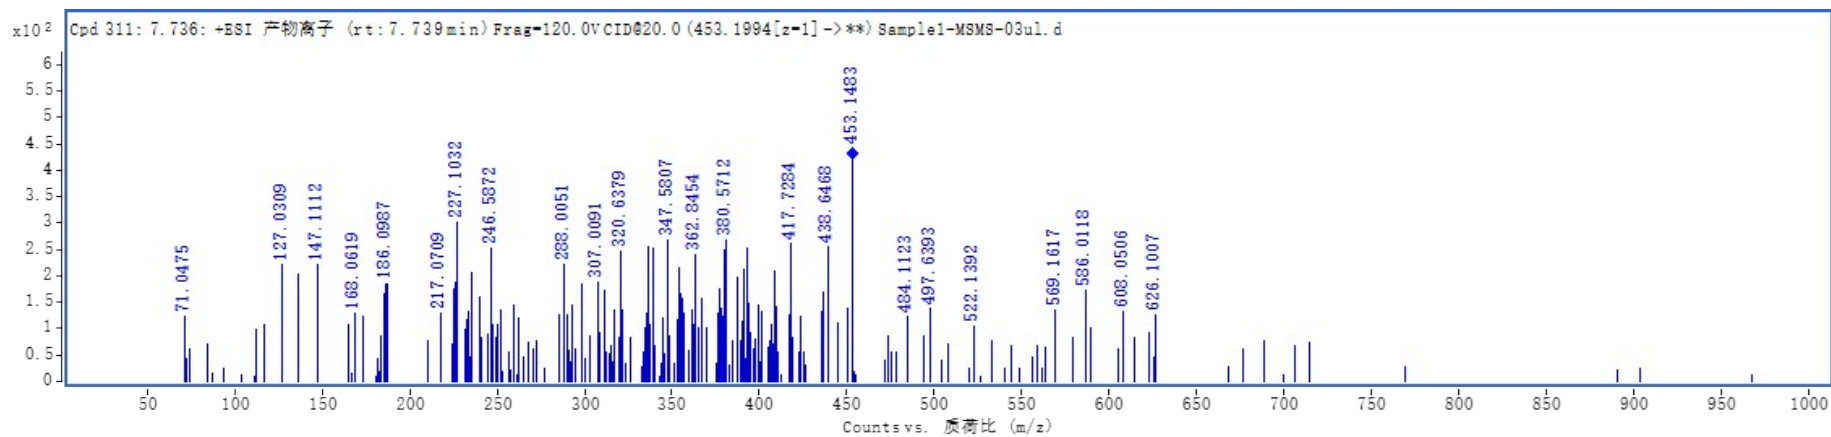

K

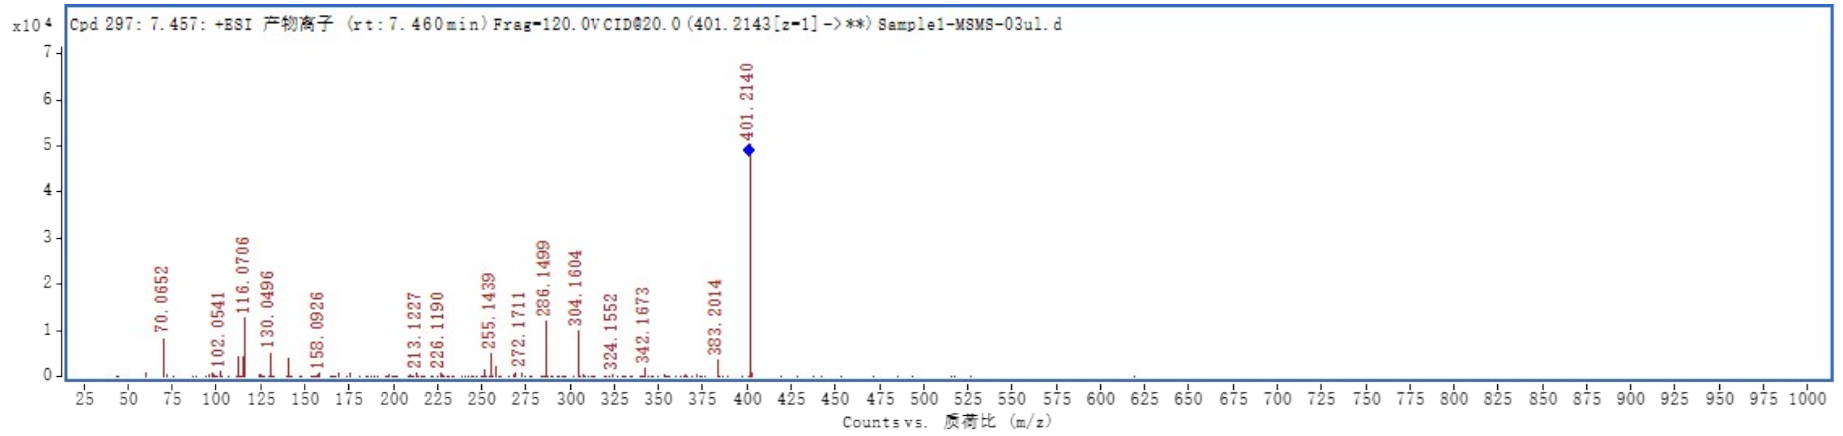

**Figure S1.** Tandem mass spectra of UPLC-ESI-Q-TOF MS. Peptides are (A) EY, (B) EG, (C) EV, (D) ENG, (E) PEG, (F) DEL, (G) ECG, (H) DDL, (I) PPEL, (J) EDCS and (K) DGPL
